# Supplementary material
Source: PubMed Central journal article supplement (PMC4948183)
Supplement: NIHMS798983-supplement-Supplementary_Information.pdf [file NIHMS798983-supplement-Supplementary_Information.pdf]

# ***$\alpha$ -Methylation Follows Condensation in the Gephyronic Acid Modular Polyketide Synthase***

Drew T. Wagner<sup>1,4</sup>, D. Cole Stevens<sup>1,4</sup>, M. Rachel Mehaffey<sup>2</sup>, Hannah R. Manion<sup>1</sup>, Richard E. Taylor<sup>3</sup>, Jennifer S. Brodbelt<sup>2</sup>, and Adrian T. Keatinge-Clay<sup>1,2,\*</sup>

<sup>1</sup>Department of Molecular Biosciences, The University of Texas at Austin, Austin, Texas, USA

<sup>2</sup>Department of Chemistry, The University of Texas at Austin, Austin, Texas, USA

<sup>3</sup>Department of Chemistry and Biochemistry, University of Notre Dame, Notre Dame, Indiana, USA

|                                        |       |
|----------------------------------------|-------|
| MT cloning and expression              | 2     |
| Substrate synthesis                    | 2     |
| <i>In vitro</i> MT reaction conditions | 2-3   |
| HPLC and HRMS analysis                 | 3-30  |
| Supplementary figures                  | 31-34 |



of **1** to **2** was observed at 25-50  $\mu\text{M}$  Pfs; Pfs concentrations below 25  $\mu\text{M}$  provided lower conversions.

Reactions conditions for 200  $\mu\text{L}$  dimethylating MT reactions containing Pfs were as follows, either **1** (10 mM), **2** (10 mM) or malonyl-S-NAC (10 mM); Tris-HCl (150 mM); NaCl (100 mM); SAM (30 mM); Pfs (25  $\mu\text{M}$ ); GphMT (50  $\mu\text{M}$ ); and glycerol (10% v/v).

Reactions were run at  $\sim 25$   $^{\circ}\text{C}$  for 24-72 h. After completion, reactions with diketide **1** were extracted with 3 reaction volumes of EtOAc. The organic layer was dried *in vacuo* and resuspended in MeOH for HPLC analysis. After completion, reactions with malonyl-S-NAC were heated to precipitate enzyme and centrifuged to clarify the supernatant for HPLC analysis.

Scaled 20 mL GphMT1 reactions: **1** (10 mM), Tris-HCl (150 mM); NaCl (100 mM); SAM (30 mM); Pfs (50  $\mu\text{M}$ ); GphMT (50  $\mu\text{M}$ ); and glycerol (10% v/v). Reaction was stirred at room temperature for 60 h and extracted with 3 volumes of EtOAc (3 x 20 mL). The EtOAc layer was washed with brine, dried over  $\text{MgSO}_4$ , and concentrated *in vacuo* to provide a yellow oil that was purified *via* flash chromatography (75% EtOAc:hexanes) to provide **2** as a yellow oil (36 mg, 78%).

Methylation of excised acyl-ACPs: Thiol reactions to produce acyl-ACPs were **1** (5 mM),  $\text{NaHCO}_3$  pH 8.1(150mM), and GphACP(1/6) (50  $\mu\text{M}$ ). Thiol reactions to produce malonyl-ACPs were malonyl-CoA (5 mM),  $\text{NaHCO}_3$  pH 8.1 (300mM), and GphACP(1/6) (50  $\mu\text{M}$ ). Thiol exchange were run at room temperature for  $\sim 30\text{m}$ . Following thiol exchange, Acyl-/malonyl-ACPs were collected with a 10 kDa spin filter. Methylation reactions to monitor methylation of excised ACPs were malonyl-/acyl-ACP ( $\sim 10$   $\mu\text{M}$ ), Tris-HCl (150 mM); NaCl (100 mM); SAM (10 mM); Pfs (20  $\mu\text{M}$ ); GphMT (20  $\mu\text{M}$ ) at room temperature for  $\sim 16\text{h}$ . Methylation reactions were first filtered with a 30kDa spin filter to remove GphMTs and Pfs followed by a 10 kDa spin filter to collect malonyl-/acyl-ACPs for MS analysis.

$^1\text{H-NMR}$  (400 MHz,  $\text{CDCl}_3$ ): 6.0 (s, broad, 1H), 3.8 (q, 1H), 3.4 (m, 2H), 3.1 (m, 2H), 2.6 (m, 2H), 1.9 (s, 3H), 1.4 (d,  $J = 7.2$  Hz, 3H), 1.1 (t,  $J = 7.1$  Hz, 3H).

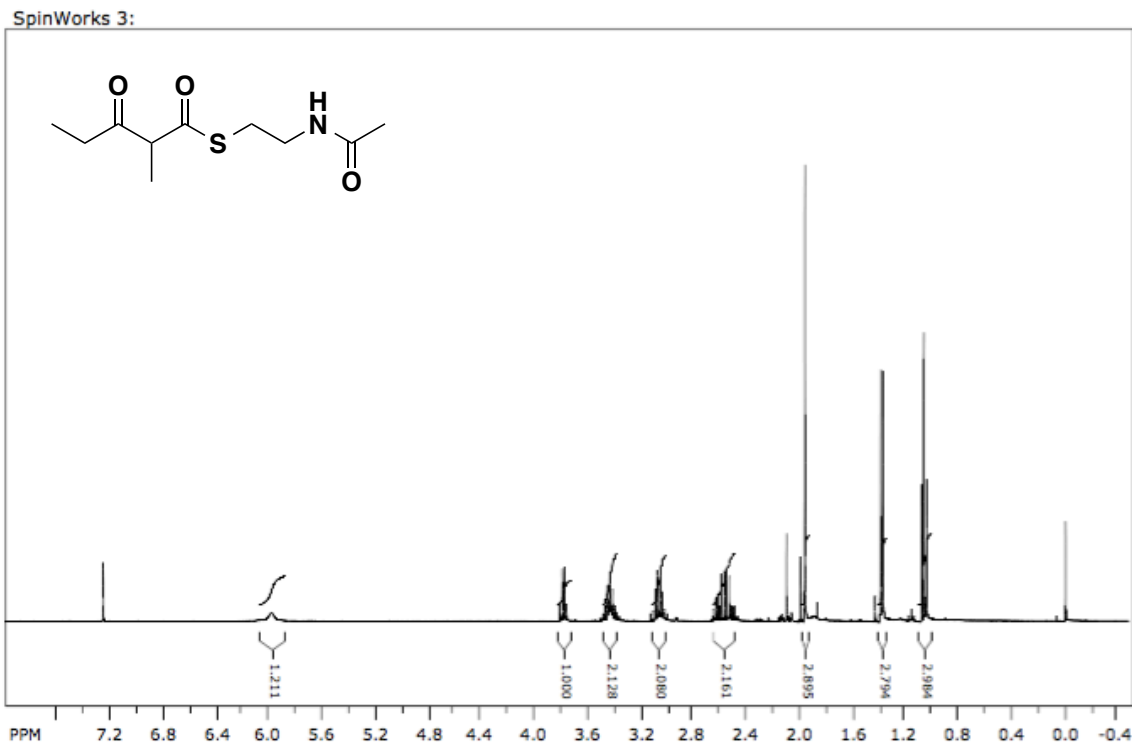

### HPLC and HRMS analysis

**HPLC conditions:** All HPLC monitoring was performed on a tandem Waters 2707 autosampler and Waters 1525 binary HPLC pump connected to a Waters 2998 photodiode array detector using a Varian Microsorb-MV C18 column (250 x 4.6 mm, 5  $\mu\text{m}$  particle size, 100  $\text{\AA}$  pore size) and mobile phases consisting of water with 0.1% TFA (solvent A) and acetonitrile with 0.1% TFA (solvent B) with a solvent gradient of 5%-100% B over 30 min at a flow rate of 1 mL/min.

**HRMS conditions:** High-resolution mass spectrometry measurements were obtained by chemical ionization (ESI) with a VG analytical ZAB2-E instrument.

**HRMS & MS/MS conditions:** All experiments were performed on a Thermo Fisher Scientific Orbitrap Elite mass spectrometer (San Jose, CA) modified with a 193 nm ArF excimer laser (Coherent ExciStar XS) to perform ultraviolet photodissociation (UVPD) experiments in the HCD cell. Protein solutions were loaded into Au-coated borosilicate emitters (10  $\mu\text{M}$  in 50% (v/v) acetonitrile) and ionized offline using a nano-ESI source or by separation using a Dionex UltiMate 3000 RPLC nanoLC system integrated with an ESI source. Chromatographic separations were performed using water (mobile phase A) and acetonitrile (mobile phase B), each containing 0.1% formic acid with a solvent gradient of 15% to 55% B over 45 min at a flow rate of 300 nL/min. The trap (30 mm x 0.1 mm) and analytical columns (with integrated emitter) (20 cm x 0.075 cm) were packed in-house using 5  $\mu\text{m}$  Agilent PLRP-S resin (1000  $\text{\AA}$  pore size). CID mass spectra were collected using normalized collision energy 25%. UV photoactivation of the modified proteins was achieved using one pulse with energy 2 mJ/pulse. MS1 and MS/MS spectra (50-250 scans) were acquired at 240 K resolving power (at  $m/z$  400). Processing of MS/MS spectra was performed using Xtract and ProSight 3.0 to identify fragment ions.



ESI-MS of phosphopantetheinylated GphACP1 thioesterified with 3-oxopentanoyl-S-NAC (a) before and (b) after MT reaction. Insets give expanded views of the deconvoluted spectra (mass range 13550-13700 Da) labeled with the monoisotopic masses and mass accuracies relative to the theoretical mass of the modified proteins.

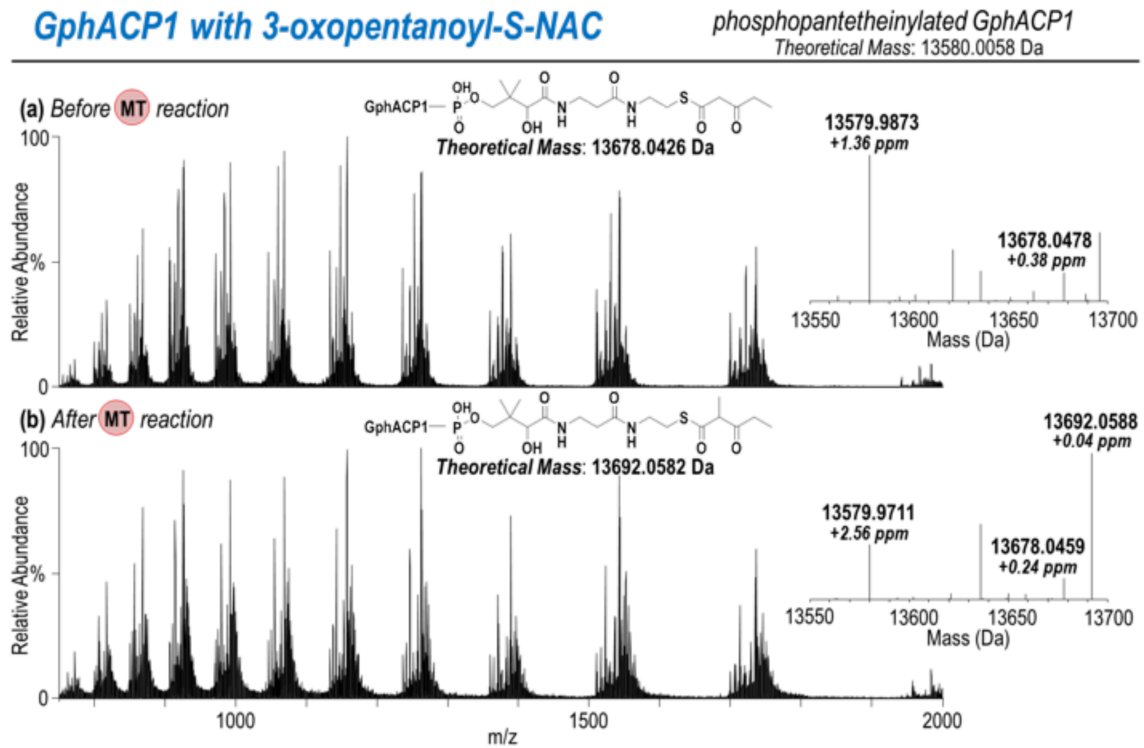

Deconvoluted MS/MS spectrum (mass range 350-380 Da) resulting from CID of the 15+ charge state of phosphopantetheinylated GphACP1 with 3-oxopentanoyl-S-NAC (a) before and (b) after MT reaction. Highlighted peaks correspond to the thioesterified phosphopantetheine moiety cleaved from the protein upon collisional activation labeled with the monoisotopic mass and mass accuracy relative to the theoretical mass.

## GphACP1 with 3-oxopentanoyl-S-NAC

CID of 15+

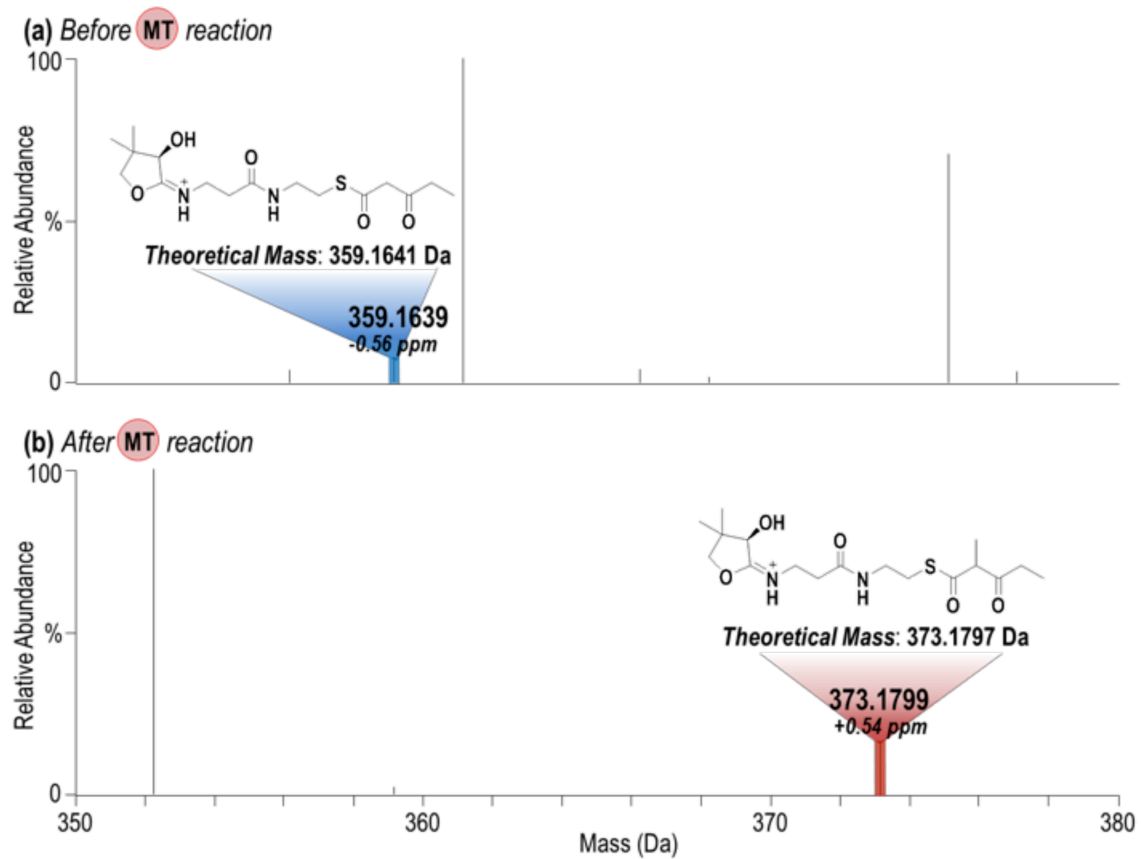

Deconvoluted MS/MS spectrum resulting from UVPD of the 15+ charge state of phosphopantetheinylated GphACP1 with 2-methyl-3-oxopentanoyl-S-NAC. Two possible modification sites were identified (Ser77 or Ser80) based on mass shifts in the observed fragment ions.

### GphACP1 with 2-methyl-3-oxopentanoyl-S-NAC

UVPD of 15+  
84% sequence coverage

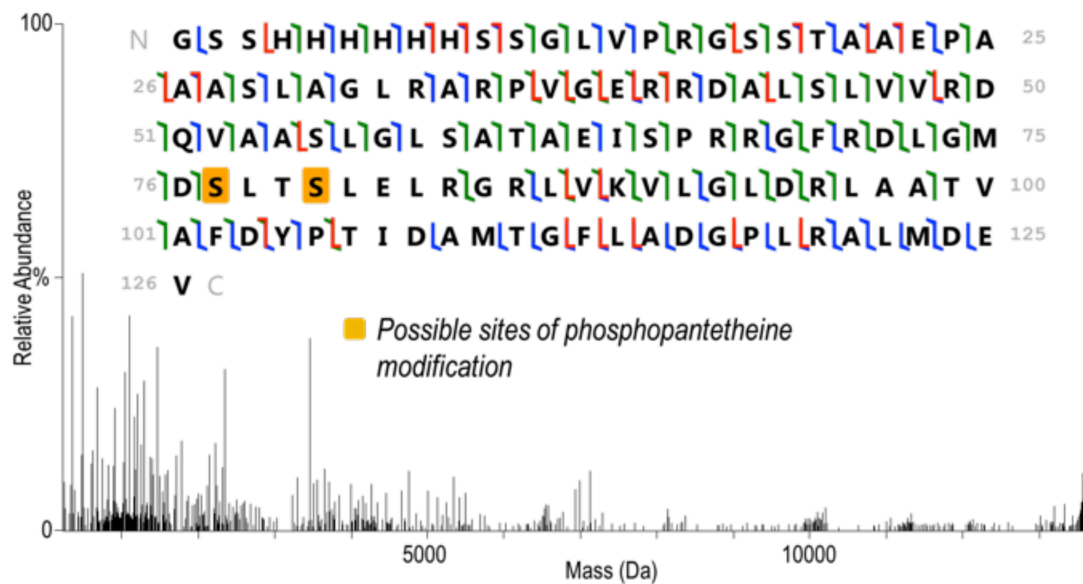

ESI-MS of phosphopantetheinylated GphACP6 thioesterified with 3-oxopentanoyl-S-NAC (a) before and (b) after MT reaction. Insets give expanded views of the deconvoluted spectra (mass range 13500-13620 Da) labeled with the monoisotopic masses and mass accuracies relative to the theoretical mass of the modified proteins.

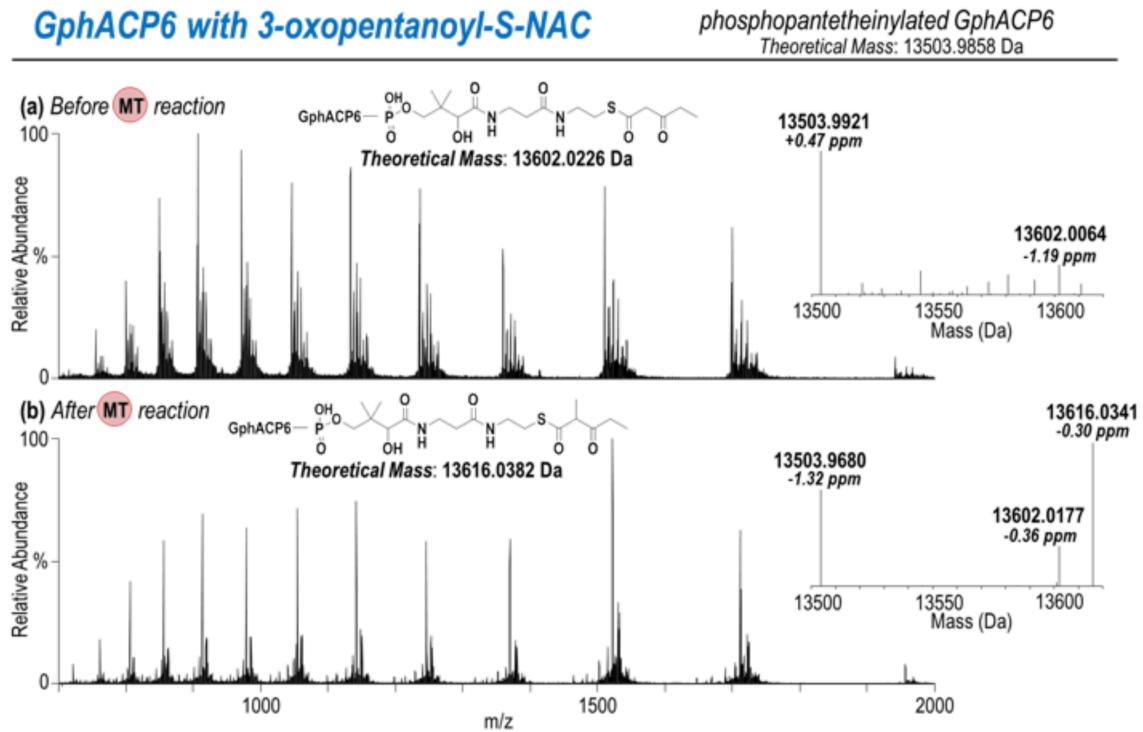

Deconvoluted MS/MS spectrum (mass range 350-380 Da) resulting from CID of the 15+ charge state of phosphopantetheinylated GphACP6 with 3-oxopentanoyl-S-NAC (a) before and (b) after MT reaction. Highlighted peaks correspond to the thioesterified phosphopantetheine moiety cleaved from the protein upon collisional activation labeled with the monoisotopic mass and mass accuracy relative to the theoretical mass.

## GphACP6 with 3-oxopentanoyl-S-NAC

CID of 15+

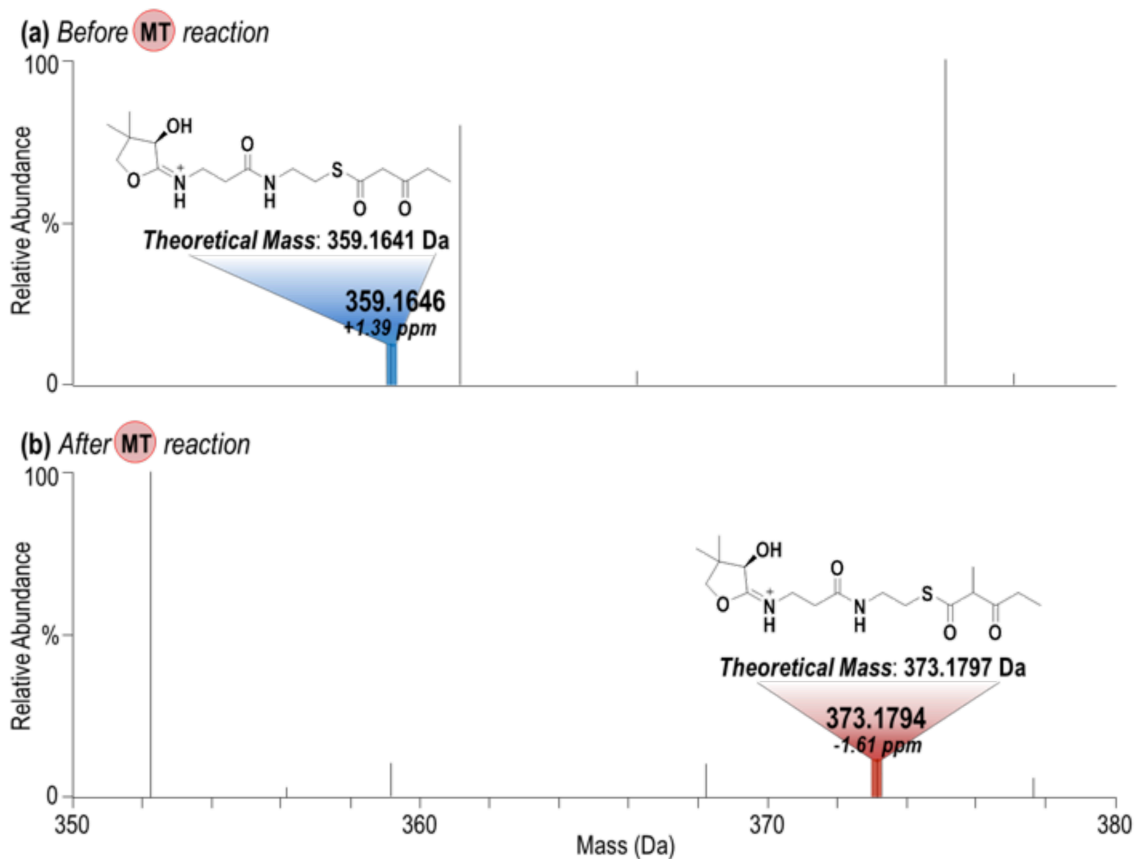

Deconvoluted MS/MS spectrum resulting from UVPD of the 15+ charge state of phosphopantetheinylated GphACP6 with 2-methyl-3-oxopentanoyl-S-NAC. The modification was localized to Se74 based on mass shifts in the observed fragment ions.

## GphACP6 with 2-methyl-3-oxopentanoyl-S-NAC

UVPD of 15+  
87% sequence coverage

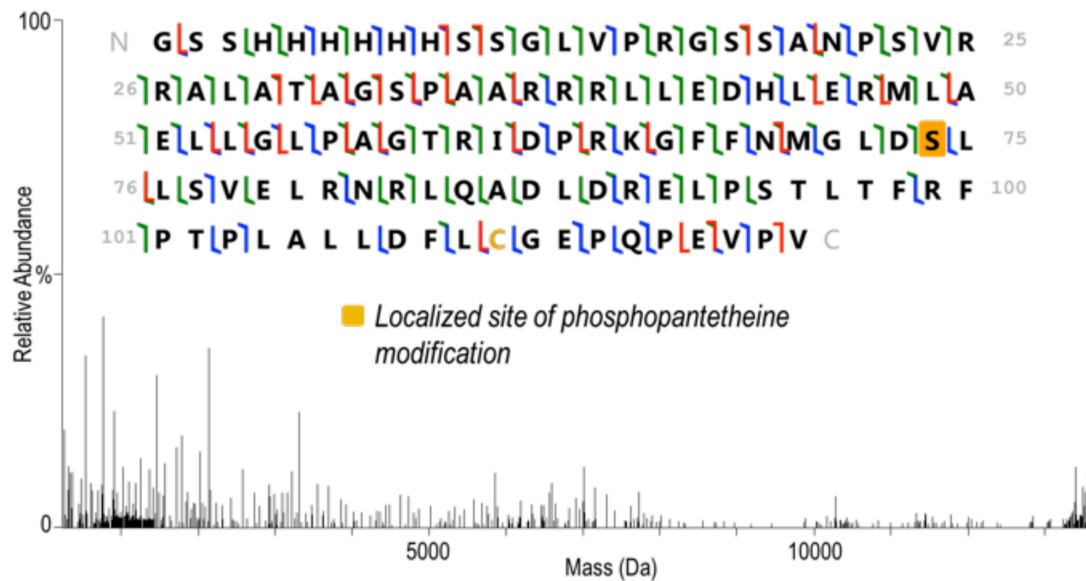

ESI-MS of phosphopantetheinylated GphACP1 thioesterified with malonyl-CoA (a) before and (b) after MT reaction. The methylated form was not observed after the reaction. Insets give expanded views of the deconvoluted spectra (mass range 13550-13700 Da) labeled with the monoisotopic masses and mass accuracies relative to the theoretical mass of the modified proteins.

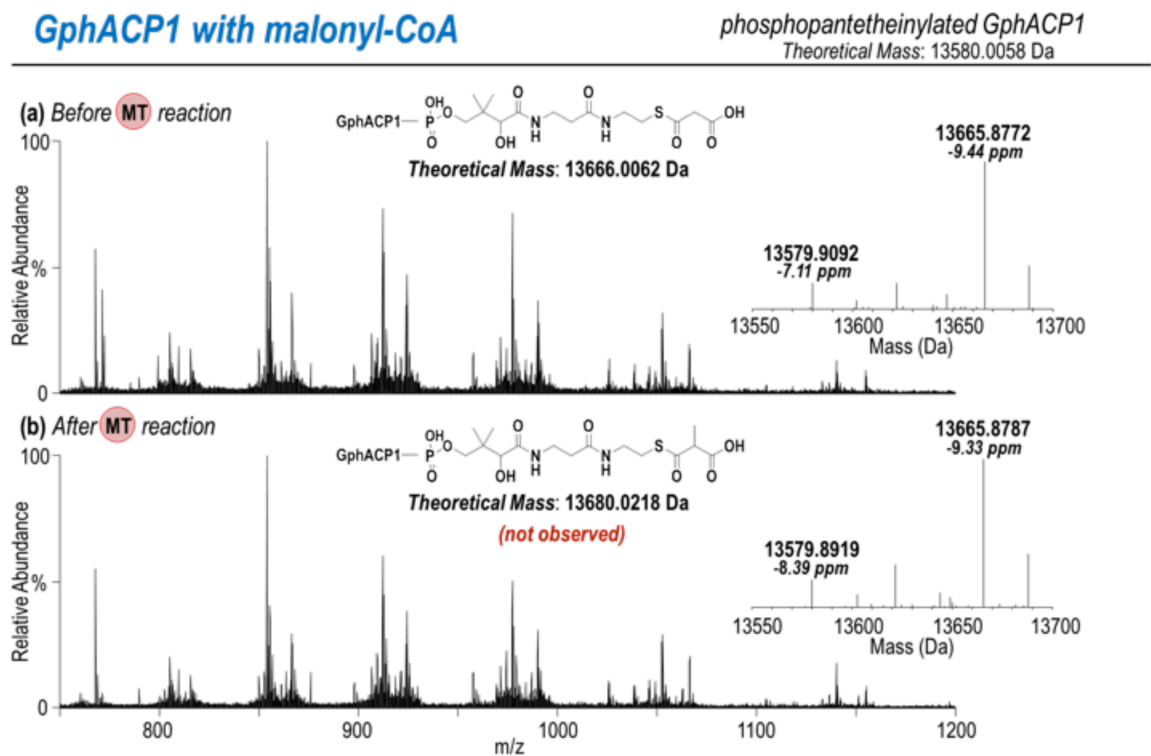

ESI-MS of phosphopantetheinylated GphACP6 thioesterified with malonyl-CoA (a) before and (b) after MT reaction. The methylated form was not observed after the reaction. Insets give expanded views of the deconvoluted spectra (mass range 13500-13620 Da) labeled with the monoisotopic masses and mass accuracies relative to the theoretical mass of the modified proteins.

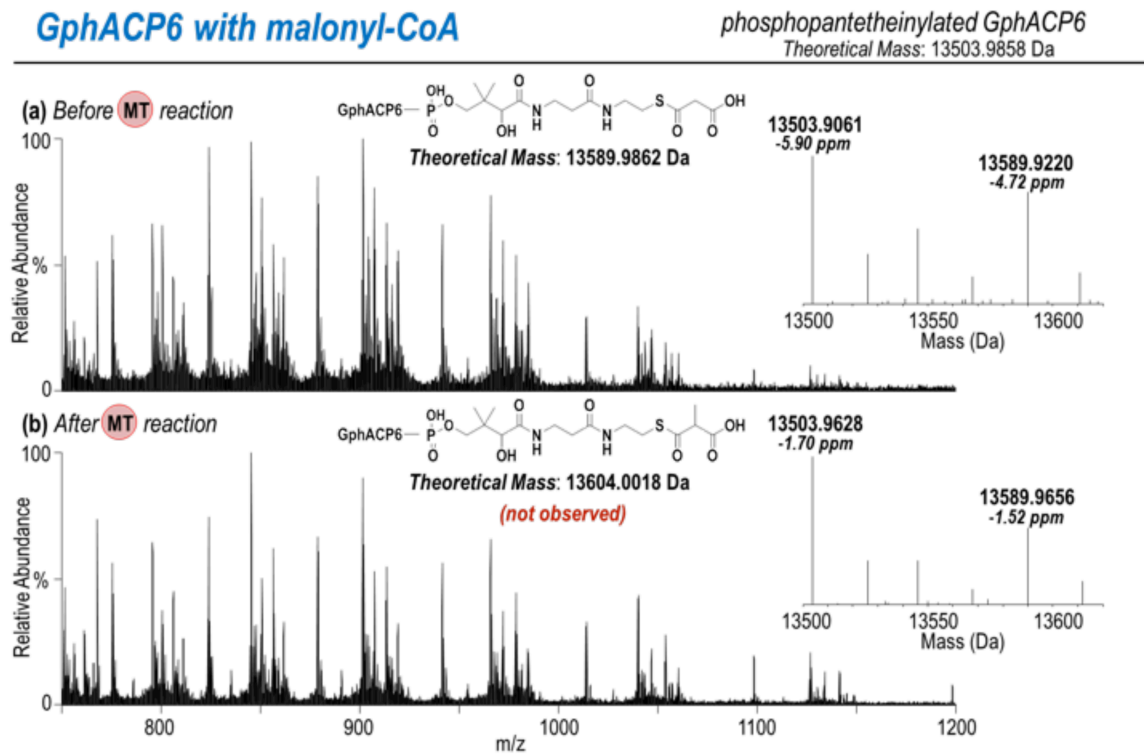



GphMT1 HPLC trace (monitoring 235 nm) 72 h without Pfs

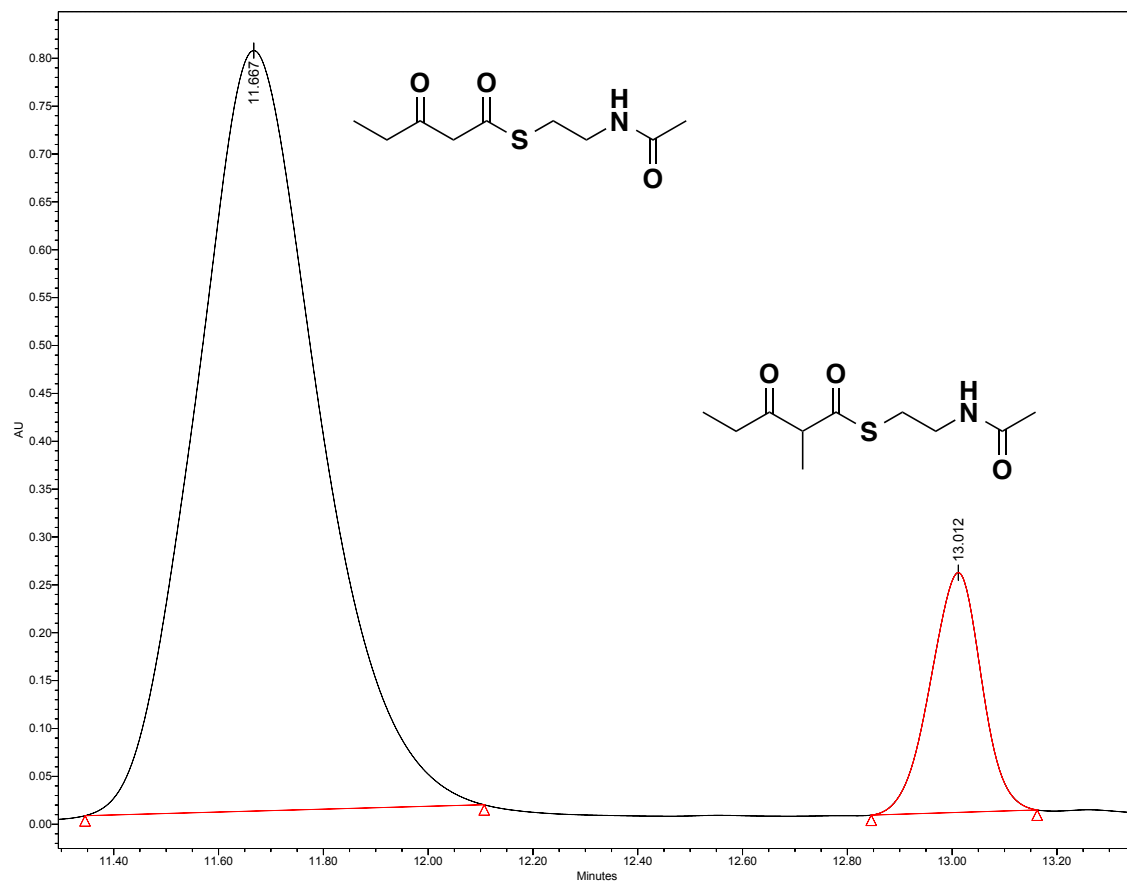

GphMT1 HPLC trace (monitoring 235 nm) 72 h with Pfs

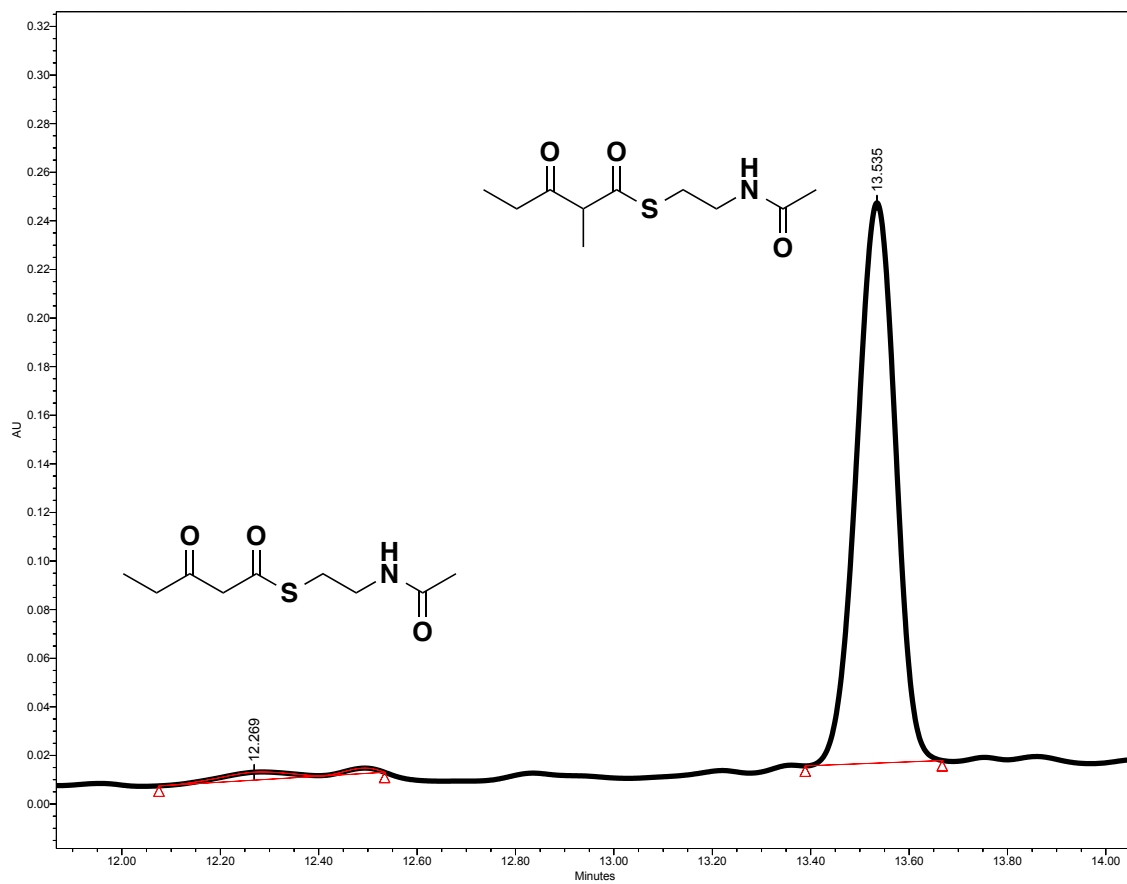

GphMT2 HPLC trace (monitoring 235 nm) 72 h without Pfs

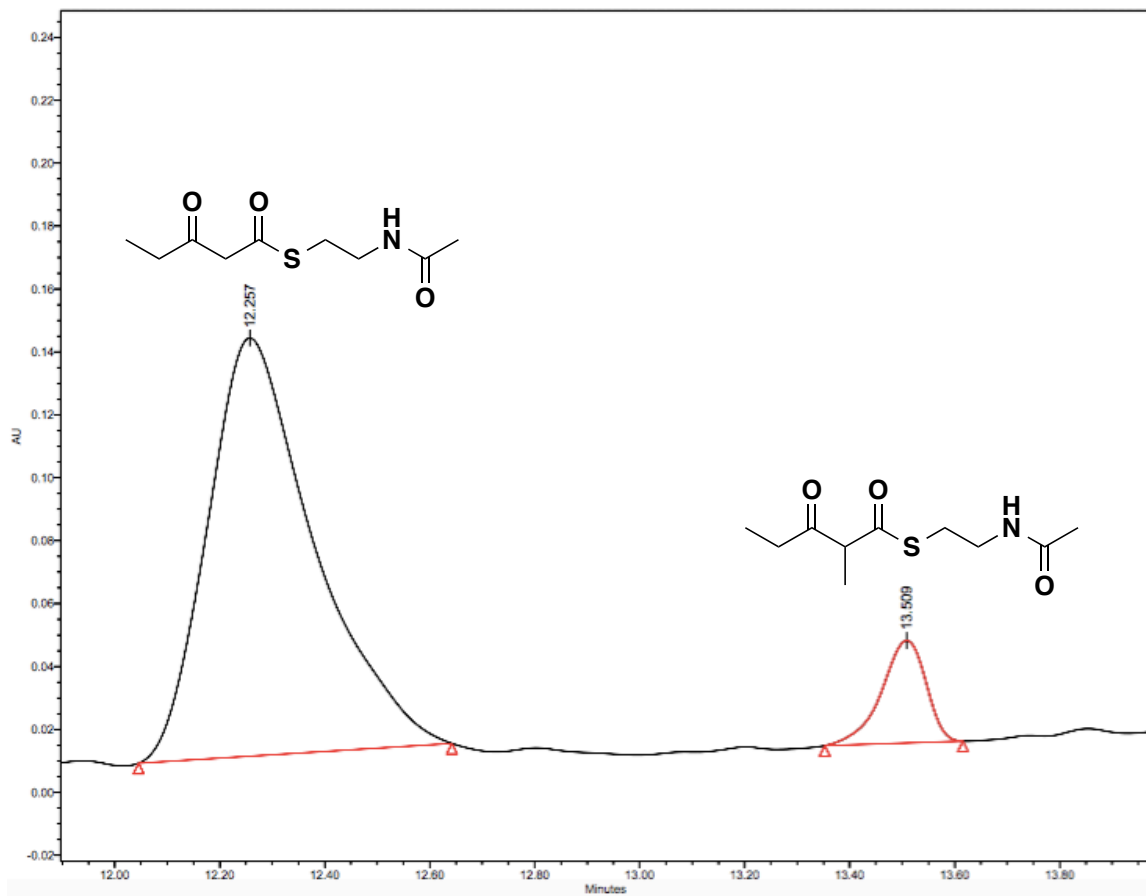

# GphMT2 HPLC trace (monitoring 235 nm) 72 h with Pfs

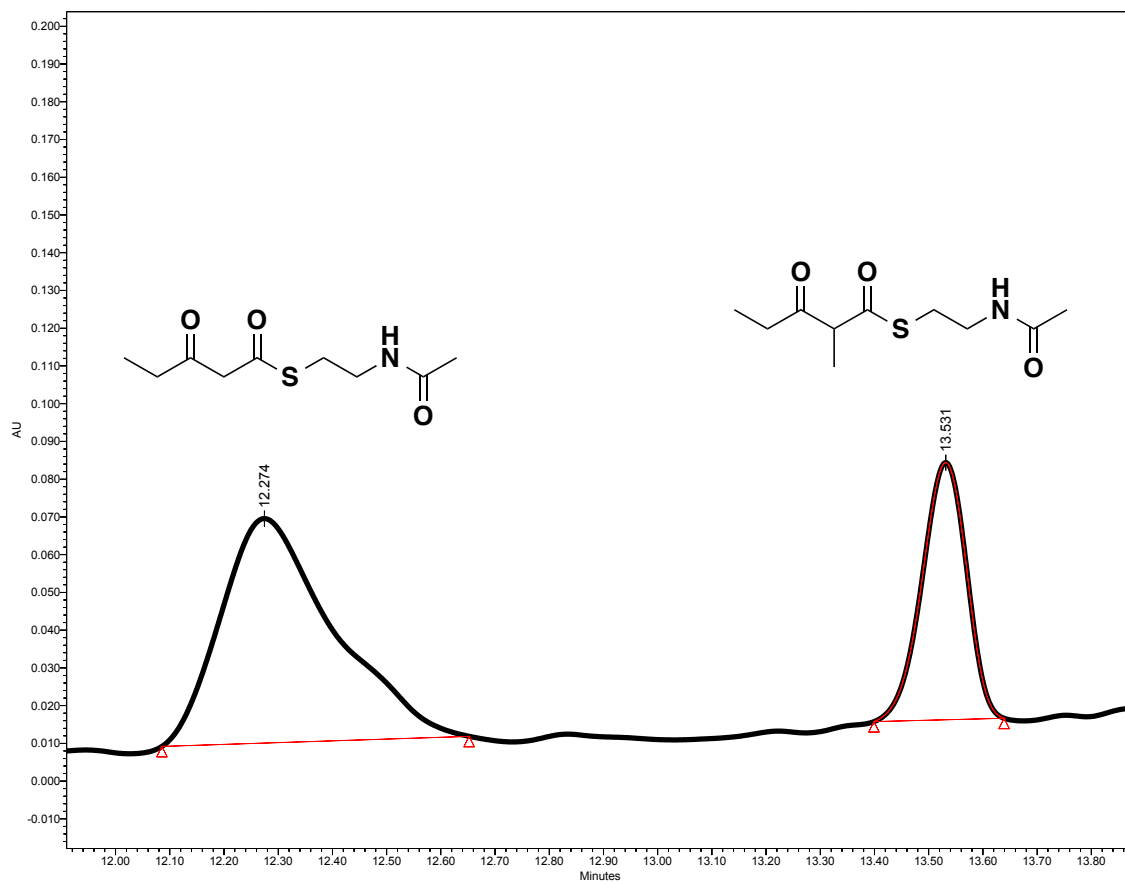

GphMT3 HPLC trace (monitoring 235 nm) 72 h without Pfs

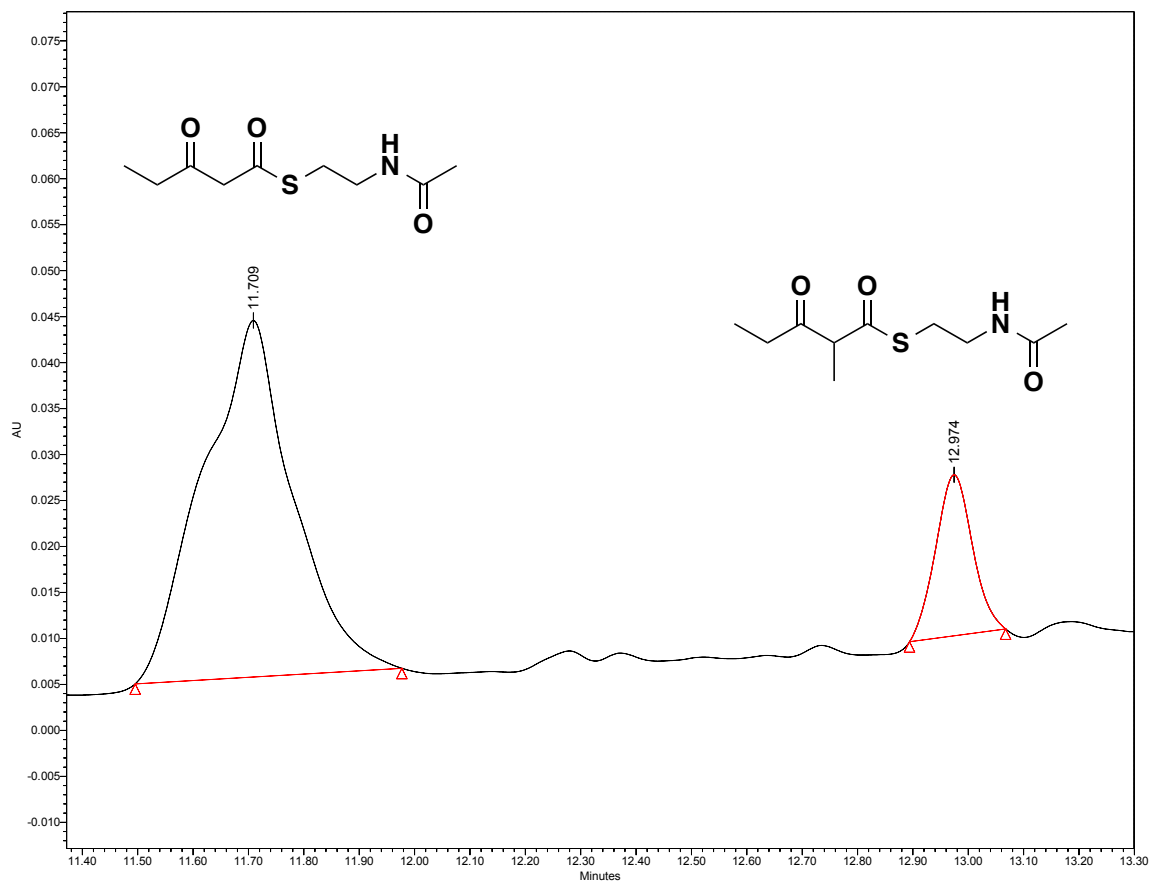

GphMT3 HPLC trace (monitoring 235 nm) 72 h with Pfs

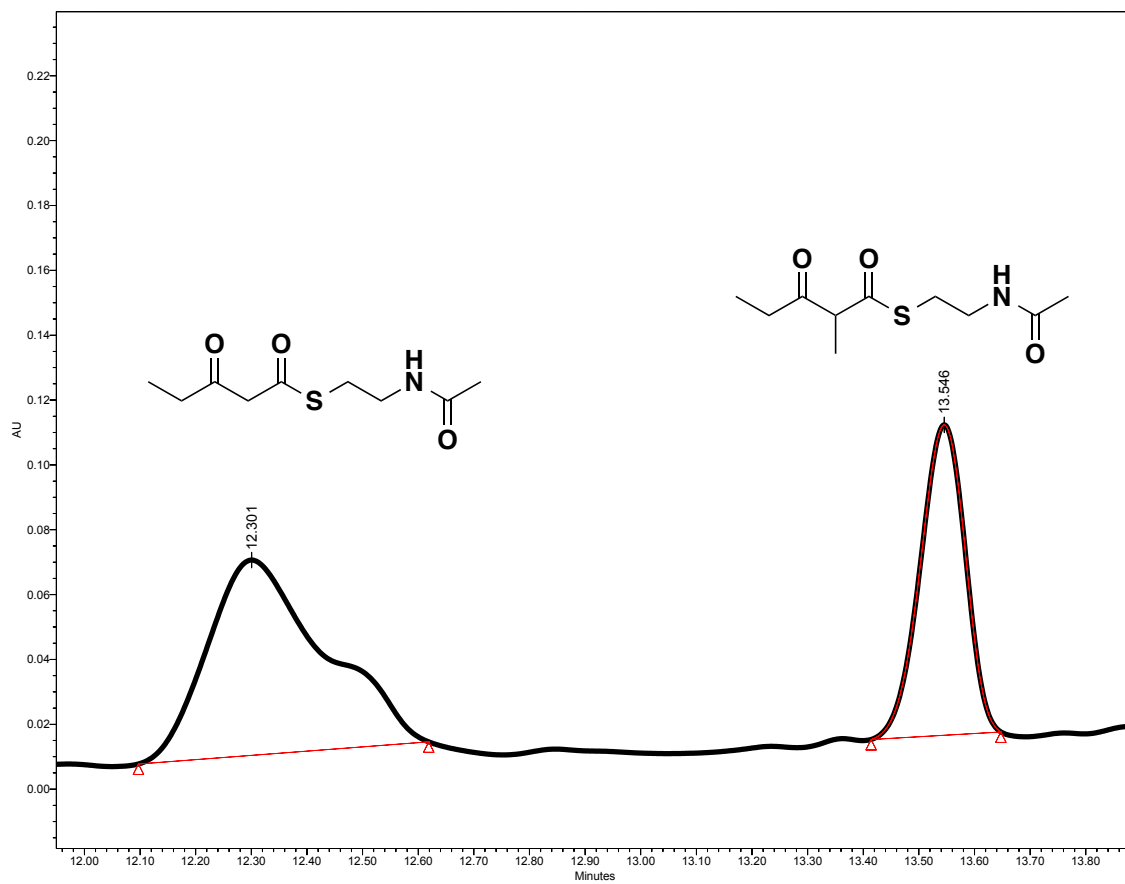

GphMT4 HPLC trace (monitoring 235 nm) 72 h without Pfs

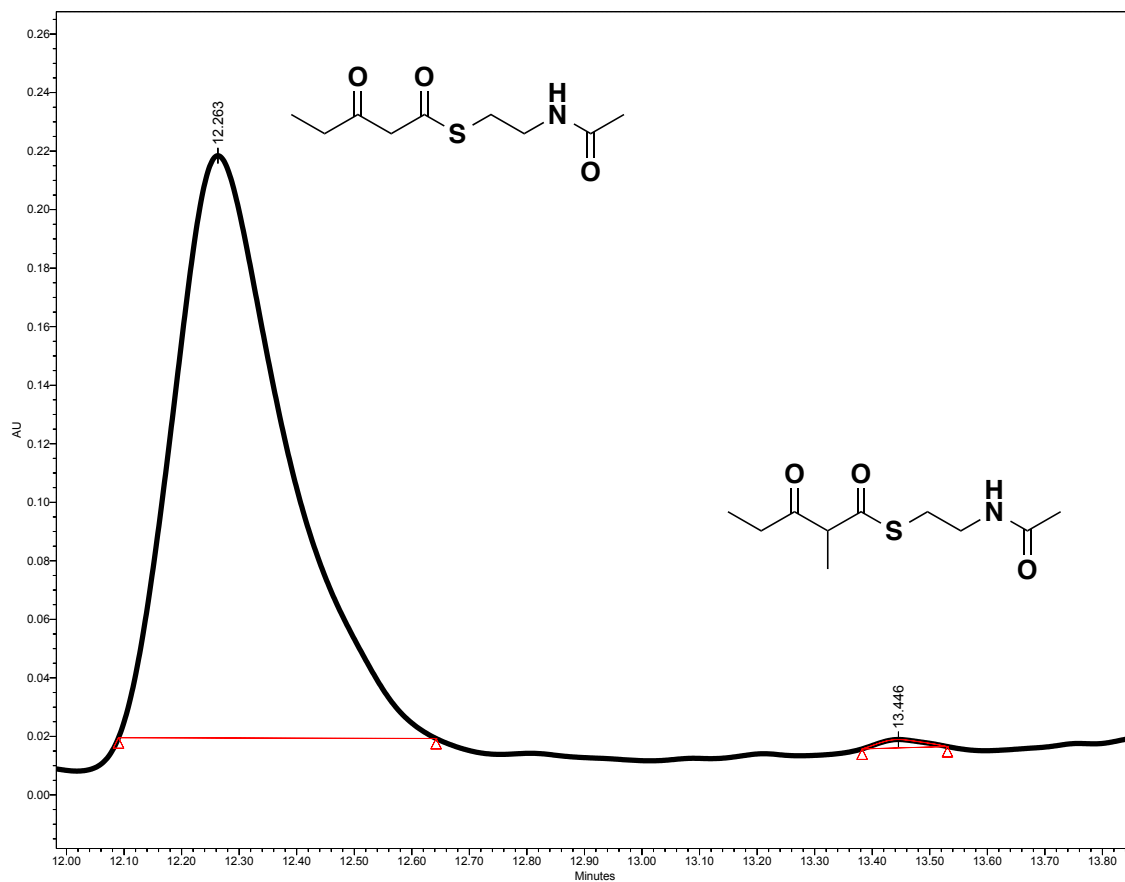

GphMT4 HPLC trace (monitoring 235 nm) 72 h with Pfs

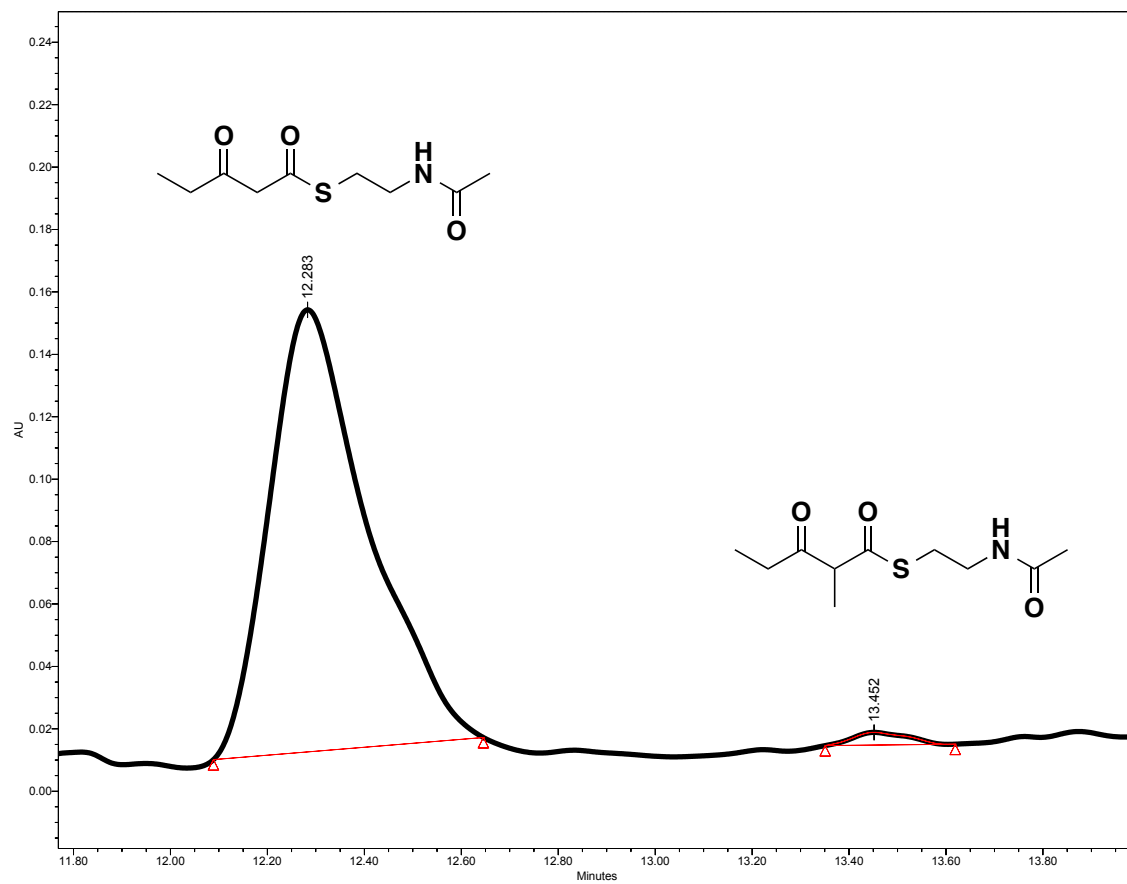



GphH module HPLC trace (monitoring 235 nm) 72 h without Pfs

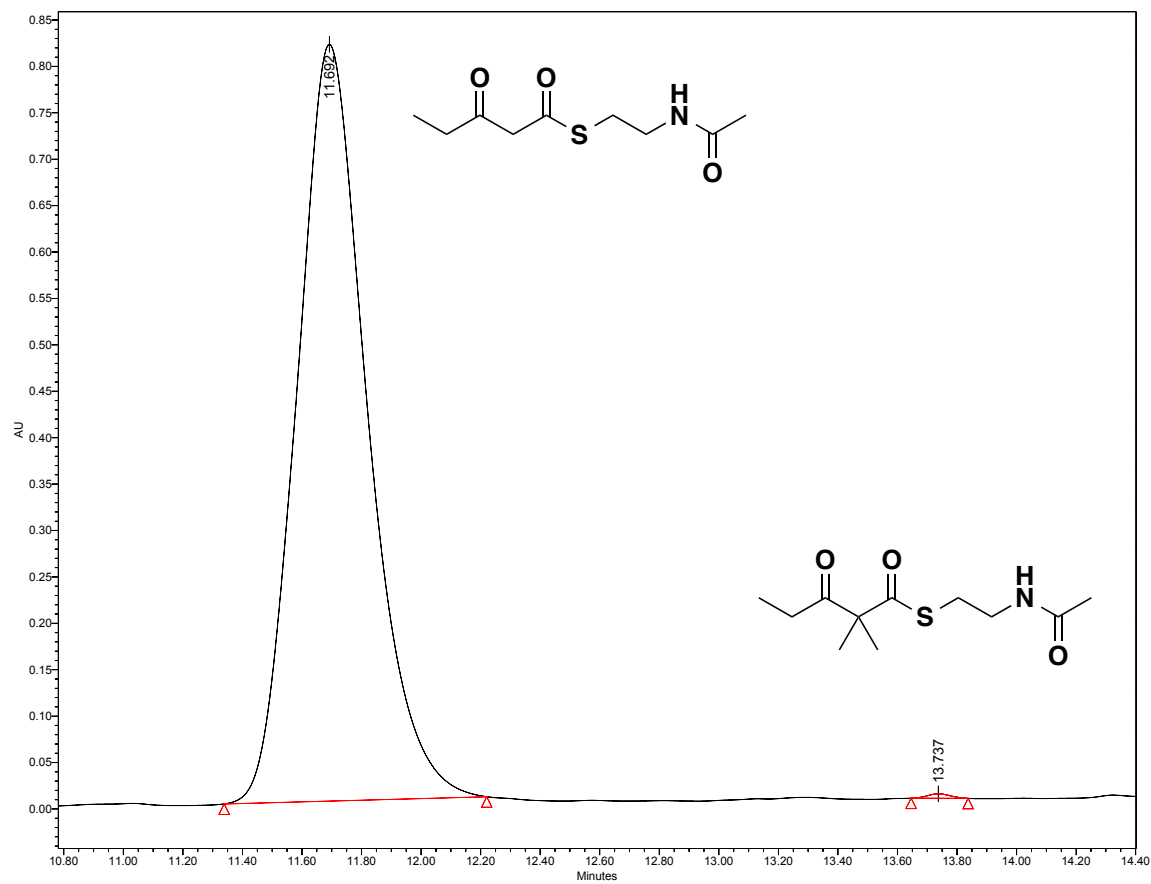

# GphH module HPLC trace (monitoring 235 nm) 72 h with Pfs

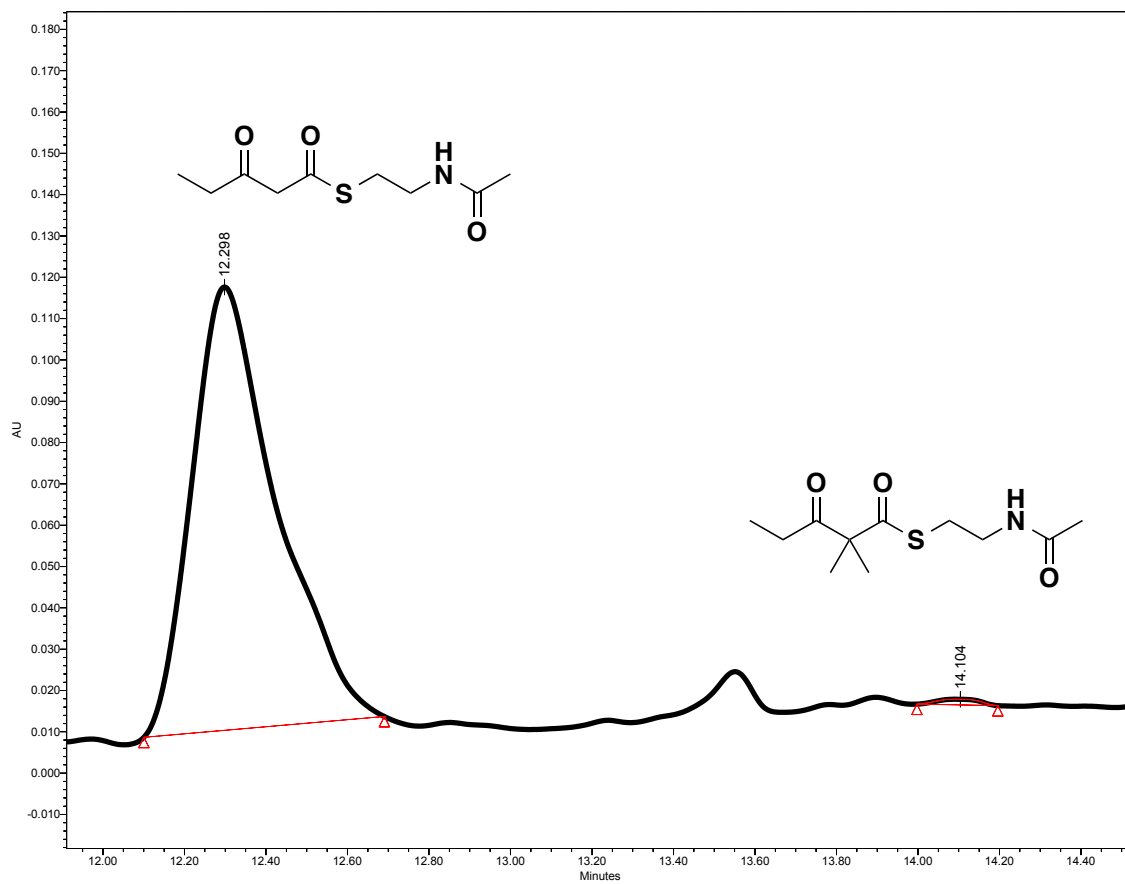

# GphMT5 HPLC trace (monitoring 235 nm) 72 h without Pfs

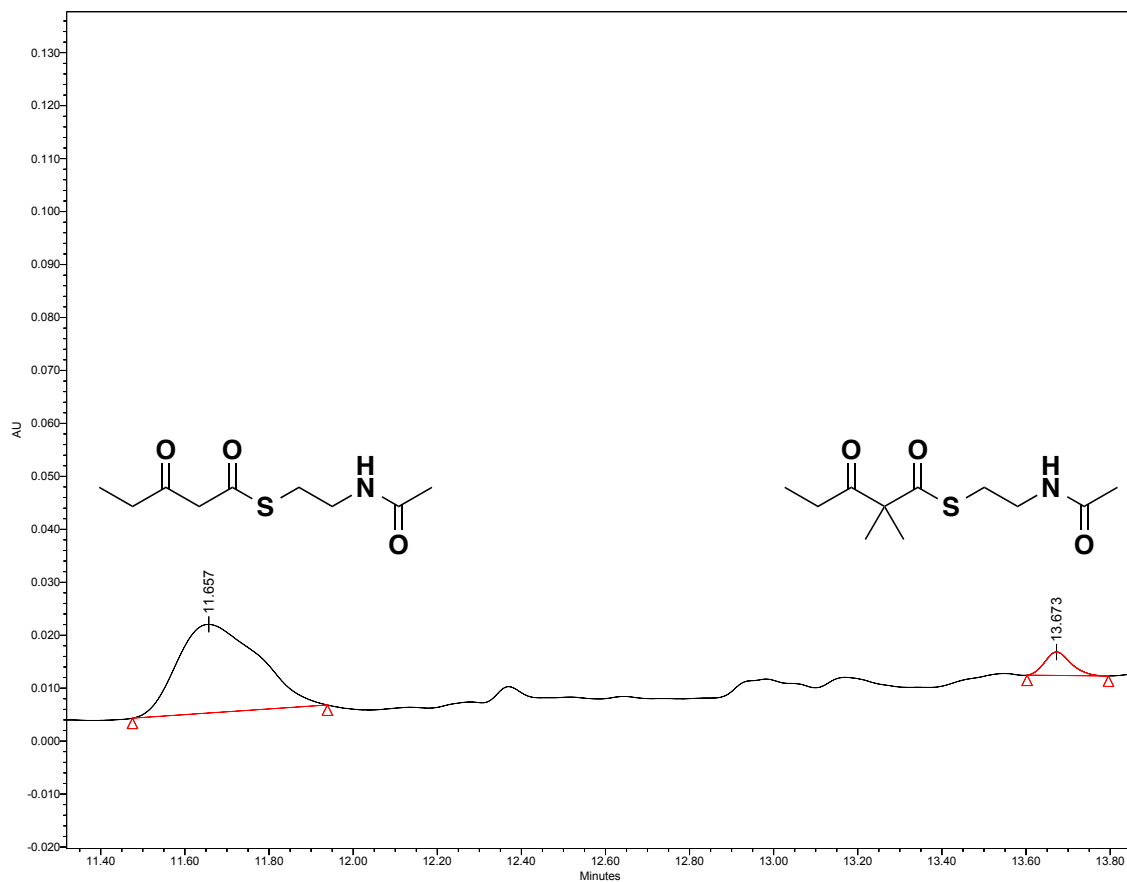

# GphMT5 HPLC trace (monitoring 235 nm) 72 h with Pfs

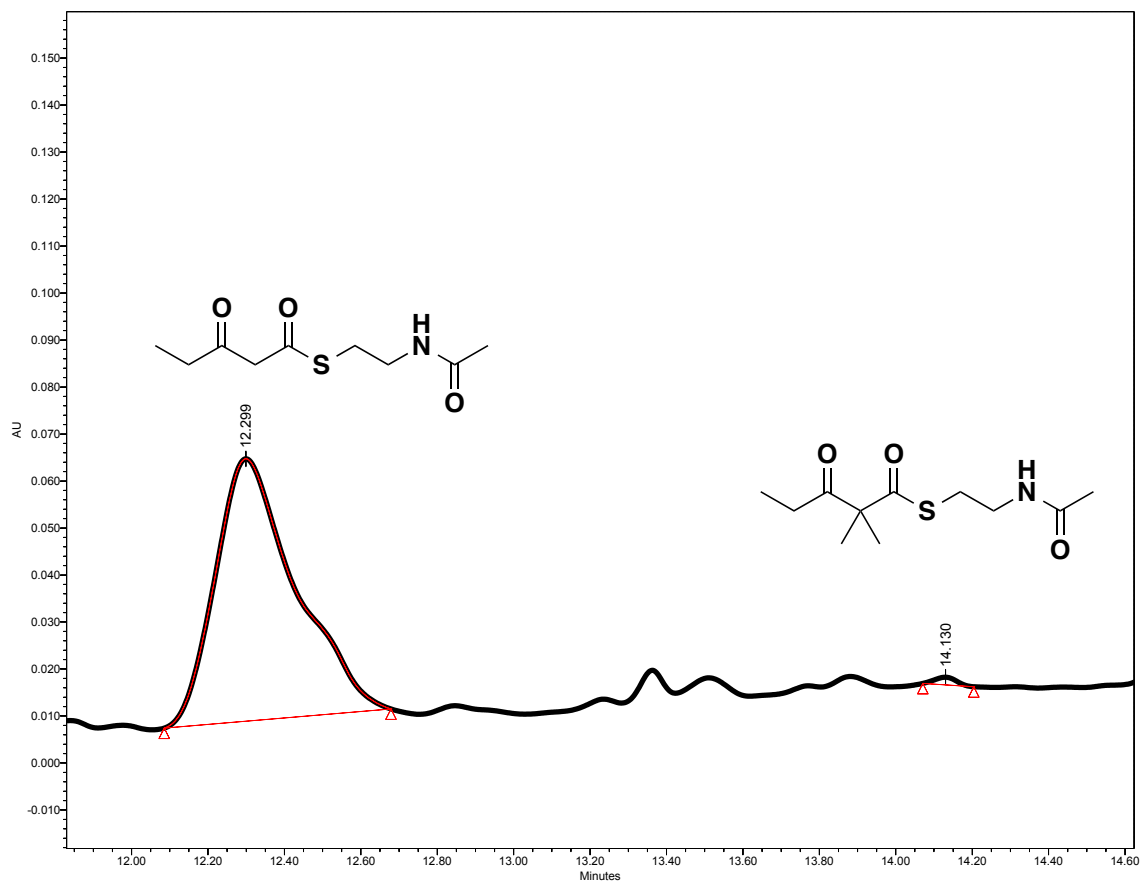

GphMT6 HPLC trace (monitoring 235 nm) 72 h without Pfs

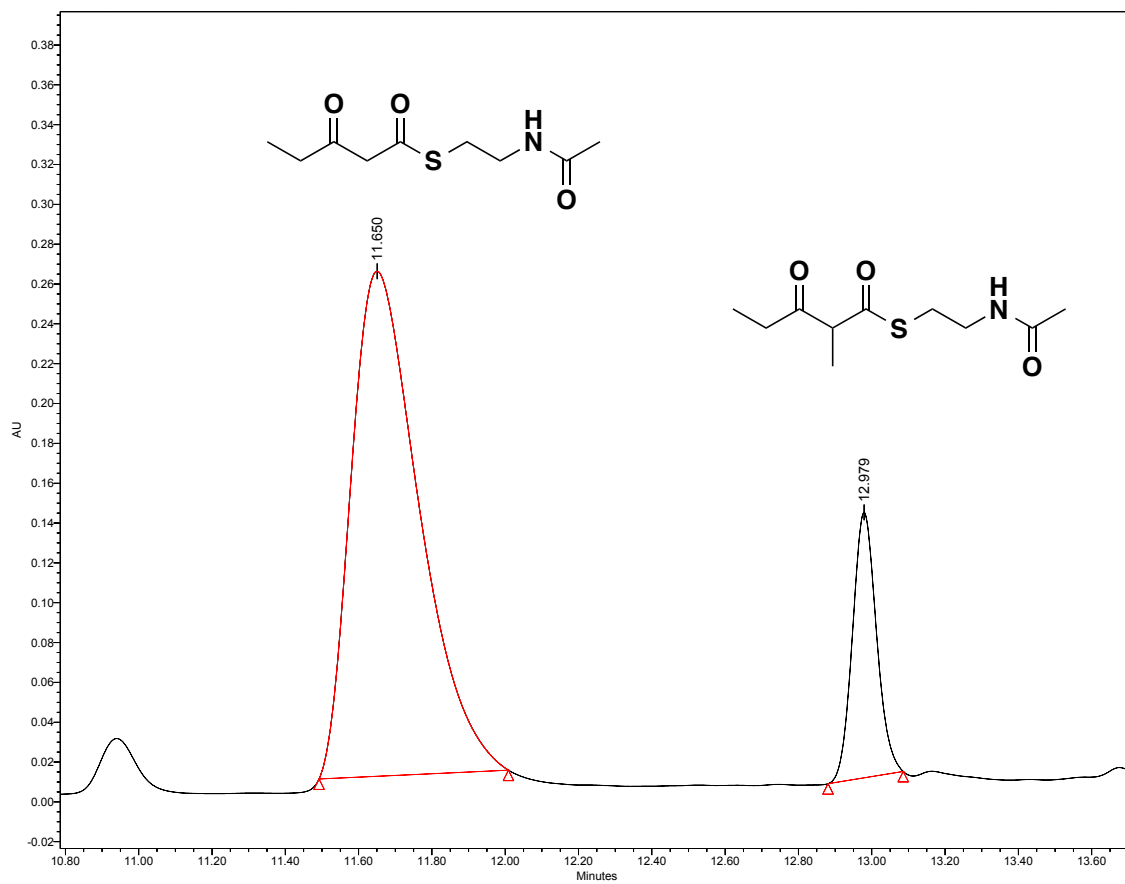

GphMT6 HPLC trace (monitoring 235 nm) 72 h with Pfs

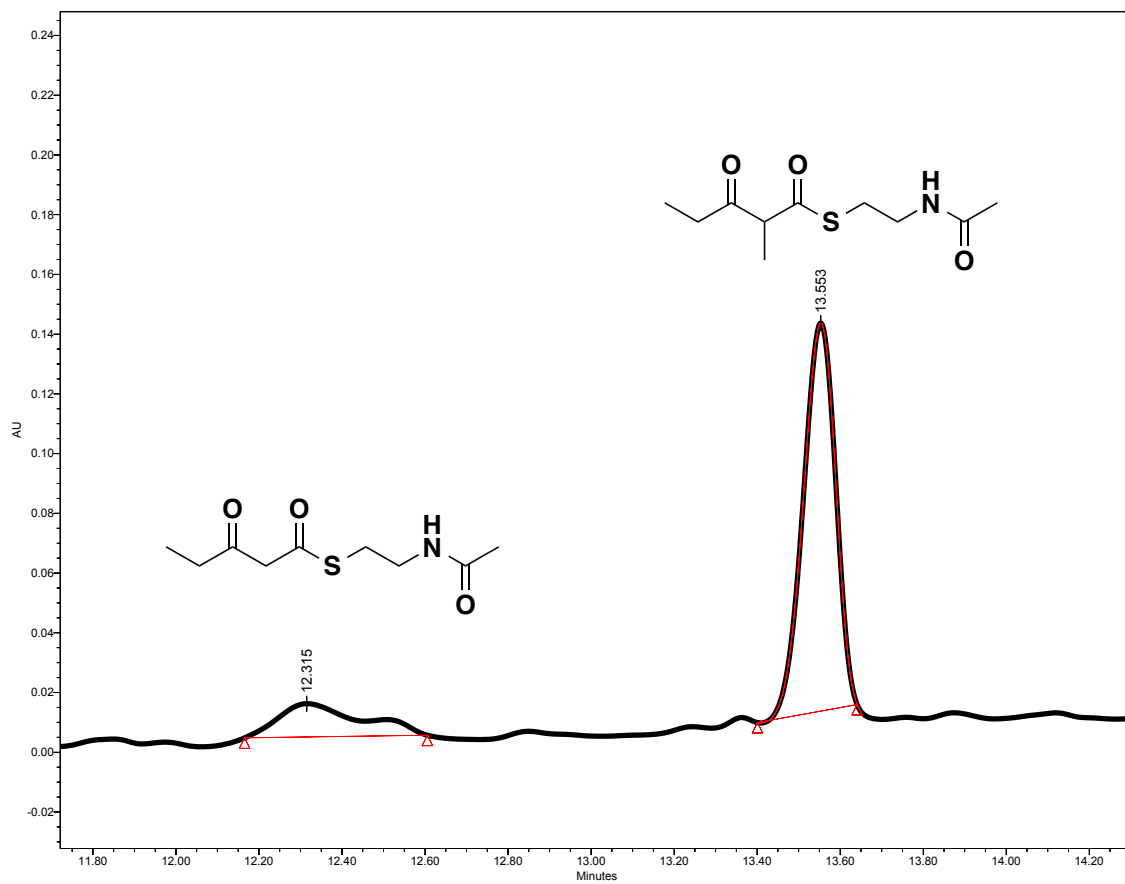

No Enzyme negative control HPLC trace (monitoring 235 nm) 72 h without Pfs

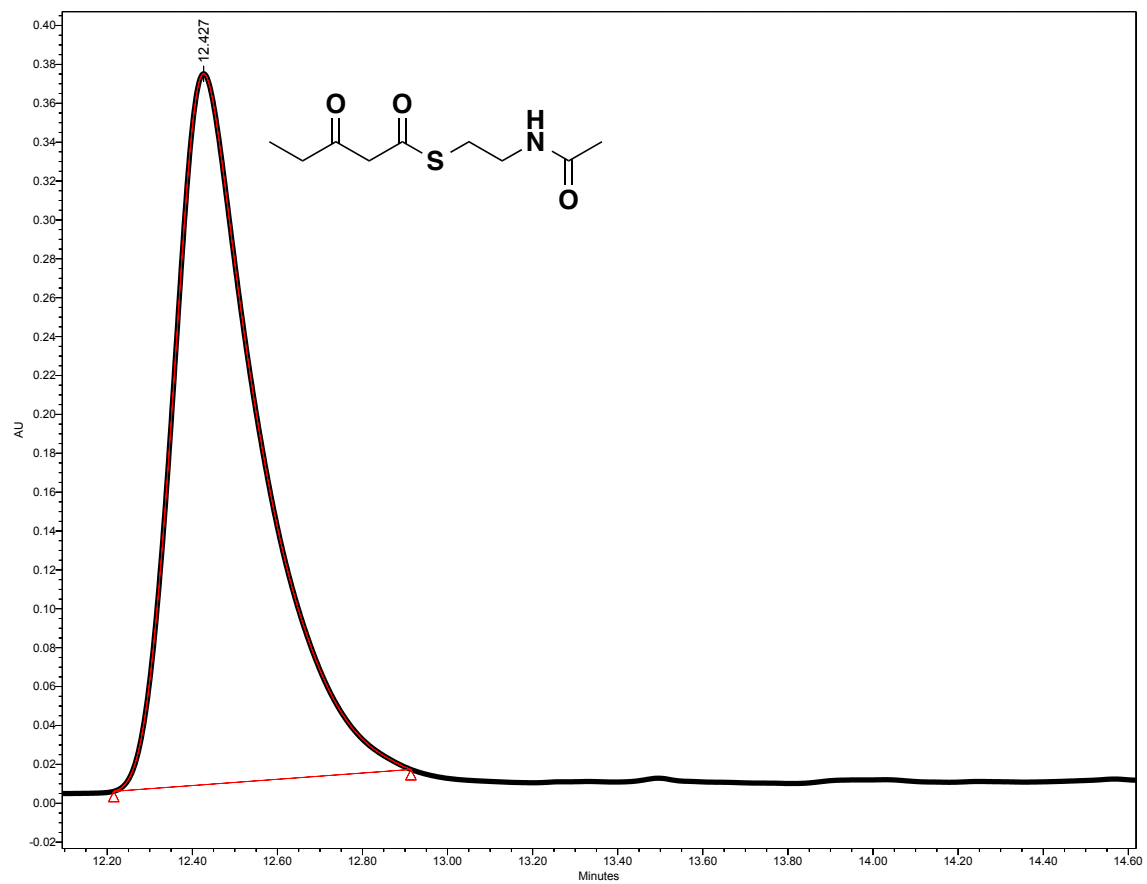

No Enzyme negative control HPLC trace (monitoring 235 nm) 72 h with Pfs

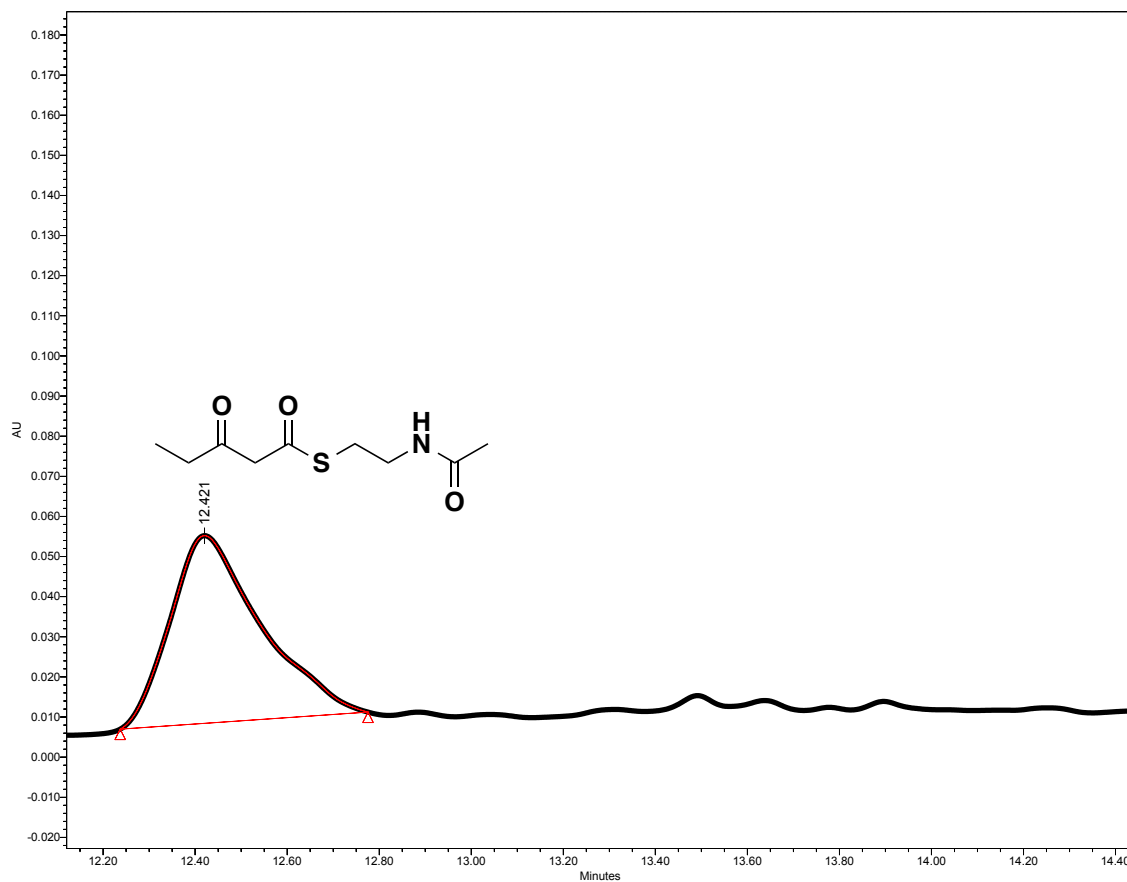



HRMS of HPLC purified **2** generated from **1** via GphMT1

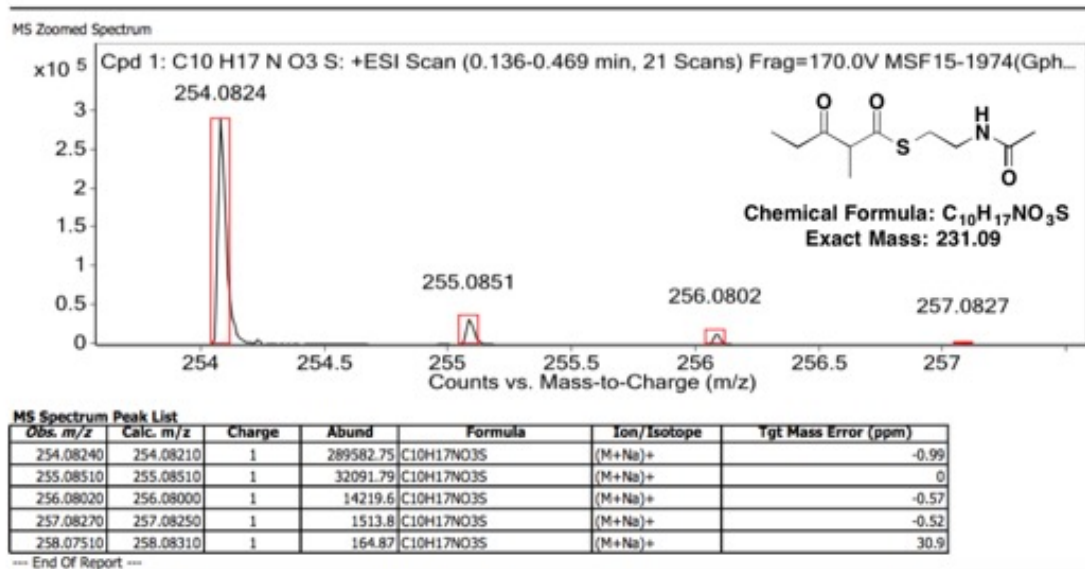

HRMS of HPLC purified **3** generated from **1** via GphMT5

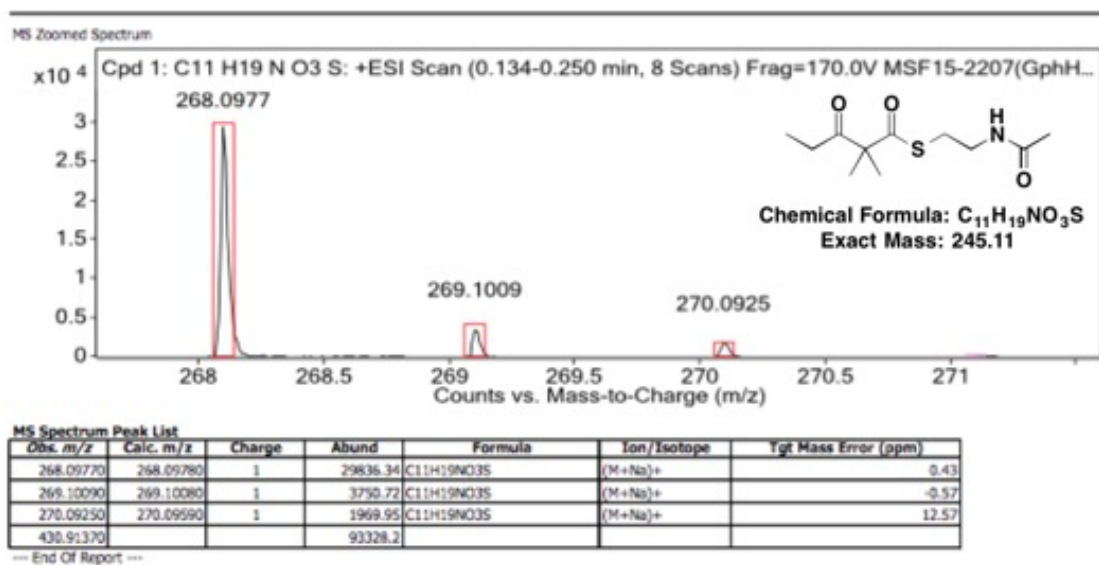

## HRMS of HPLC purified **5** generated from **4** via GphMT6

MS Zoomed Spectrum

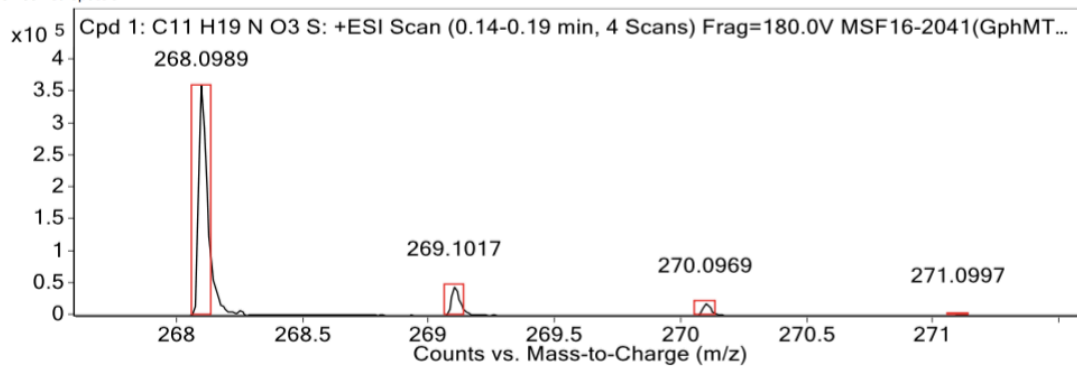

MS Spectrum Peak List

| Obs. m/z  | Calc. m/z | Charge | Abund     | Formula                                           | Ion/Isotope         | Tgt Mass Error (ppm) |
|-----------|-----------|--------|-----------|---------------------------------------------------|---------------------|----------------------|
| 268.09890 | 268.09780 | 1      | 360081.49 | C <sub>11</sub> H <sub>19</sub> NO <sub>3</sub> S | (M+Na) <sup>+</sup> | -4.24                |
| 269.10170 | 269.10080 | 1      | 45052.04  | C <sub>11</sub> H <sub>19</sub> NO <sub>3</sub> S | (M+Na) <sup>+</sup> | -3.53                |
| 270.09690 | 270.09590 | 1      | 18776.23  | C <sub>11</sub> H <sub>19</sub> NO <sub>3</sub> S | (M+Na) <sup>+</sup> | -3.78                |
| 271.09970 | 271.09830 | 1      | 3095.82   | C <sub>11</sub> H <sub>19</sub> NO <sub>3</sub> S | (M+Na) <sup>+</sup> | -5.28                |
| 272.09880 | 272.09900 | 1      | 471.19    | C <sub>11</sub> H <sub>19</sub> NO <sub>3</sub> S | (M+Na) <sup>+</sup> | 0.59                 |

## HRMS of HPLC purified **7** generated from **6** via GphMT6

MS Zoomed Spectrum

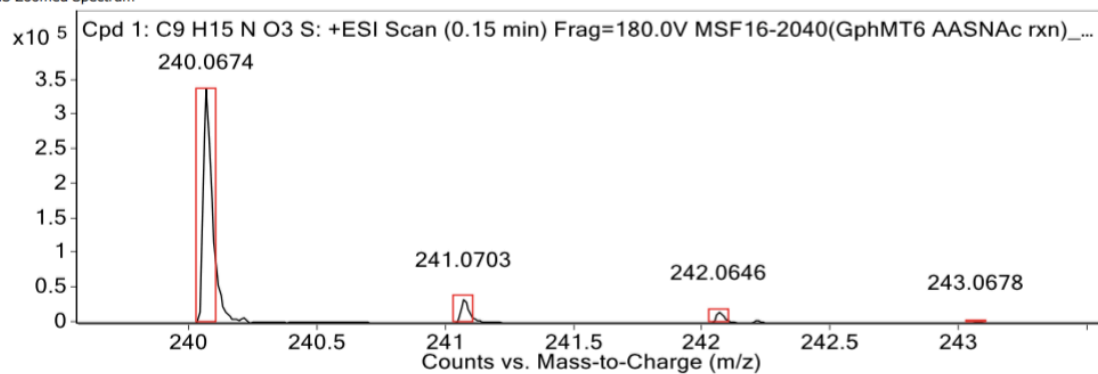

MS Spectrum Peak List

| Obs. m/z  | Calc. m/z | Charge | Abund     | Formula                                          | Ion/Isotope         | Tgt Mass Error (ppm) |
|-----------|-----------|--------|-----------|--------------------------------------------------|---------------------|----------------------|
| 240.06740 | 240.06650 | 1      | 337391.31 | C <sub>9</sub> H <sub>15</sub> NO <sub>3</sub> S | (M+Na) <sup>+</sup> | -3.66                |
| 241.07030 | 241.06940 | 1      | 35095.04  | C <sub>9</sub> H <sub>15</sub> NO <sub>3</sub> S | (M+Na) <sup>+</sup> | -3.77                |
| 242.06460 | 242.06420 | 1      | 16616.93  | C <sub>9</sub> H <sub>15</sub> NO <sub>3</sub> S | (M+Na) <sup>+</sup> | -1.58                |
| 243.06780 | 243.06680 | 1      | 2126.64   | C <sub>9</sub> H <sub>15</sub> NO <sub>3</sub> S | (M+Na) <sup>+</sup> | -4.29                |
| 244.06610 | 244.06720 | 1      | 494.45    | C <sub>9</sub> H <sub>15</sub> NO <sub>3</sub> S | (M+Na) <sup>+</sup> | 4.63                 |



**Figure S2.** MAFFT multiple sequence alignment of MT domains from several *cis*-AT PKS systems.<sup>3</sup> Myc = microcystin, Nda = nodularin, Gph = gephyronic acid, Cur = curacin, Epo = epothilone, and Ybt = yersiniabactin. ‘β1’ indicates first β-strand of KR structural subdomain. The two subsequent black lines indicate SAM binding motif of MT domain and NADPH binding motif that begins the KR catalytic subdomain, respectively.

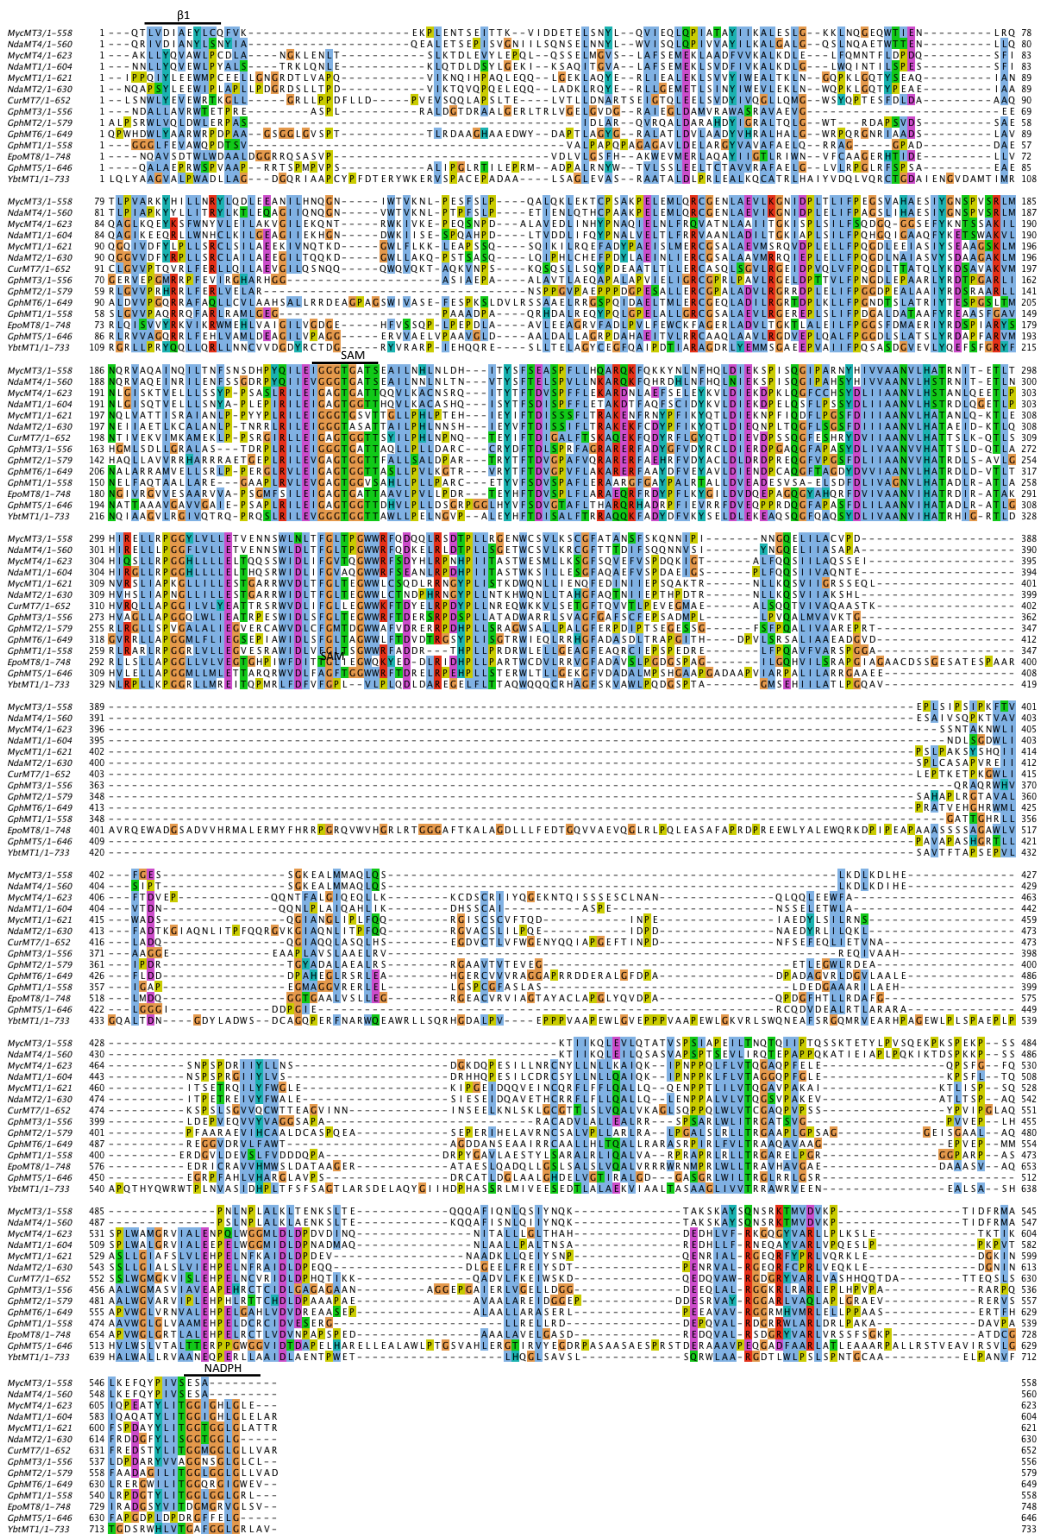

**Figure S3.** Conversion of **1** to **3** via GphH and HMT catalyzed dimethylation in the presence of Pfs.

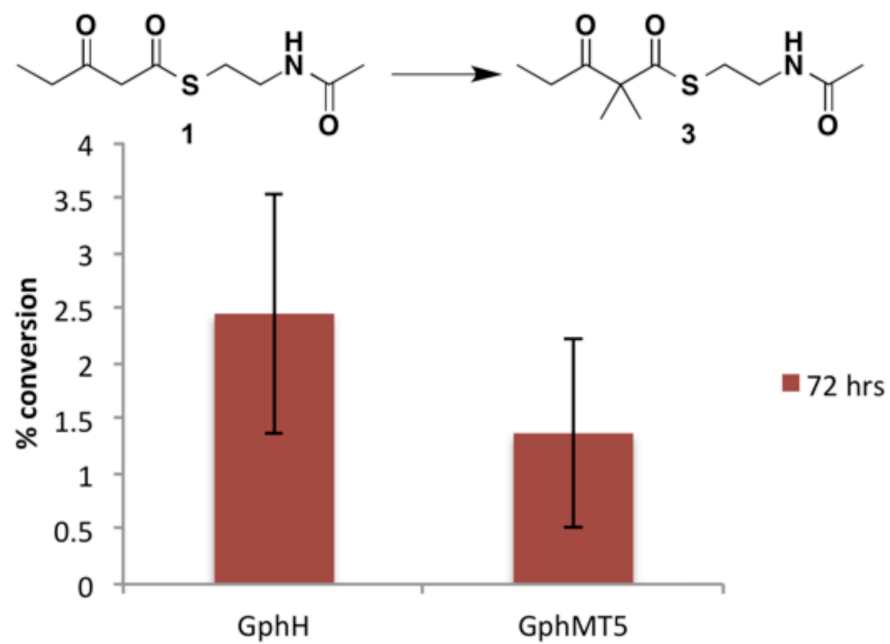

**Figure S4.** Reduction of **1** by GphMT constructs with relative conversions. *In vitro* reductions were run as previously reported.<sup>2</sup>

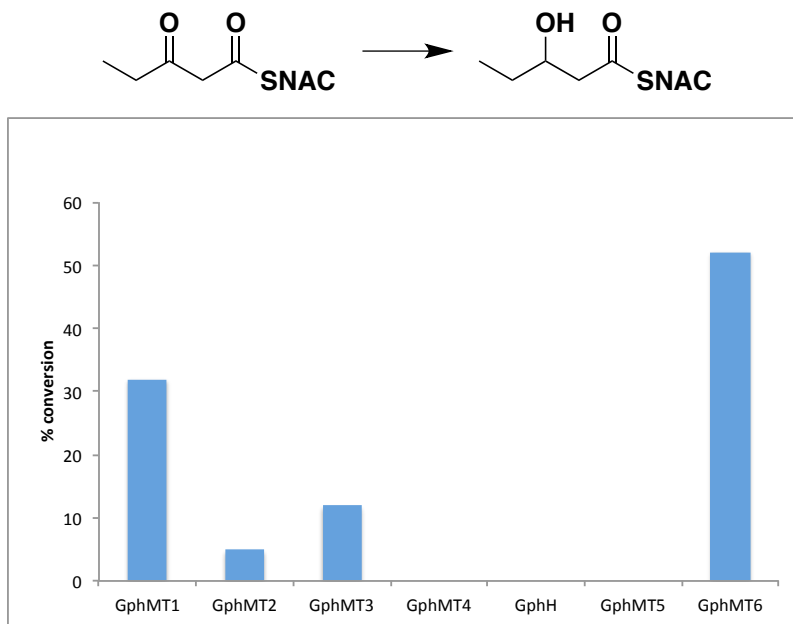

|

**Figure S5.** Reduction of **2** by KR-containing GphMT constructs with relative conversions. *In vitro* reductions were run as previously reported.<sup>2</sup>

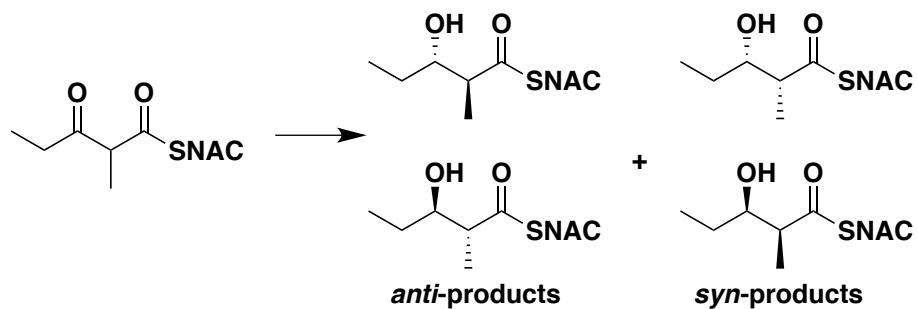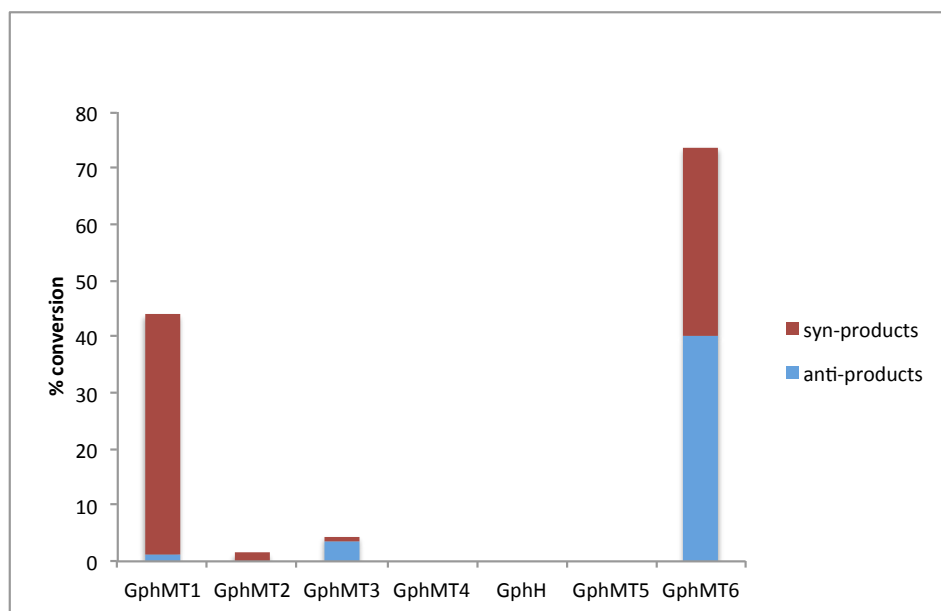

## SUPPLEMENTARY REFERENCES

- 1) Gay, G.; Wagner, D.T., Keatinge-Clay, A.T., Gay, D.C. *Plasmid* **2014**, 76C, 66.
- 2) Piasecki, S.K.; Taylor, C.A.; Detelich, J.F.; Liu, J.; Zheng, J.; Komsoukaniants, A.; Siegel, D.R.; Keatinge-Clay, A.T. *Chem. Biol.* **2011**, 18, 1331.
- 3) Katoh, K.; Standley, D.M. *Mol. Biol. Evol.* **2013**, 4, 772.
